# Supplementary material for: Obesity Is Associated with Early Onset of Gastrointestinal Cancers in California
Source: Hindawi journal article supplement (doi:10.1155/2018/7014073), 2018-09-19
Supplement: f1 [file 7014073.f1.pdf]

eTable 1: Demographic and cancer information regarding esophageal cancer patients

|                                           | Esophageal Cancer             |                         |                                |          |
|-------------------------------------------|-------------------------------|-------------------------|--------------------------------|----------|
|                                           | Morbidly Obese<br>n=92 (1.0%) | Obese<br>n = 276 (3.0%) | Non-obese<br>n = 8,961 (96.0%) | P-value* |
| <b>Age at Diagnosis,<br/>mean ± SD</b>    | 61.5 ± 11.0                   | 63.8 ± 11.0             | 68.9 ± 12.2                    | <0.01    |
| <b>Male Gender</b>                        | 65 (71.4%)                    | 225 (80.9%)             | 6,575 (74.8%)                  | 0.10     |
| <b>Race</b>                               |                               |                         |                                |          |
| <b>White</b>                              | 69 (75.8%)                    | 216 (77.7%)             | 6,420 (73.0%)                  |          |
| <b>Black</b>                              | 3 (3.3%)                      | 13 (4.7%)               | 545 (6.2%)                     |          |
| <b>Others</b>                             | 19 (20.9%)                    | 49 (17.6%)              | 1,827 (20.8%)                  | 0.15     |
| <b>AJCC Stage at<br/>Diagnosis#</b>       |                               |                         |                                |          |
| <b>0</b>                                  | 48 (1.5%)                     | 2 (1.9%)                | 48 (1.5%)                      | 0.31     |
| <b>I</b>                                  | 381 (11.5%)                   | 19 (17.8%)              | 381 (11.5%)                    |          |
| <b>II</b>                                 | 706 (21.4%)                   | 24 (22.4%)              | 706 (21.4%)                    |          |
| <b>III</b>                                | 772 (23.4%)                   | 24 (22.4%)              | 772 (23.4%)                    |          |
| <b>IV</b>                                 | 1,394 (42.2%)                 | 38 (35.5%)              | 1,394 (42.2%)                  |          |
| <b>Tumor Histology#</b>                   |                               |                         |                                |          |
| <b>Well differentiated</b>                | 5 (5.5%)                      | 19 (6.8%)               | 373 (4.2%)                     | 0.01     |
| <b>Moderately well<br/>differentiated</b> | 25 (27.5%)                    | 106 (38.1%)             | 2,734 (31.1%)                  |          |
| <b>Poorly<br/>differentiated</b>          | 46 (50.6%)                    | 110 (39.6%)             | 3,652 (41.5%)                  |          |
| <b>Undifferentiated /<br/>anaplastic</b>  | 1 (1.1%)                      | 3 (1.1%)                | 143 (1.6%)                     |          |
| <b>Smoking</b>                            | 31 (34.1%)                    | 138 (49.6%)             | 3,301 (37.6%)                  | <0.01    |
| <b>Alcoholism</b>                         | 4 (4.4%)                      | 25 (9.0%)               | 771 (8.8%)                     | 0.55     |

\*P-value denotes comparison between obese and non-obese patients.

# Missing information regarding staging is present in 5,830 (62.5%); patients; missing information regarding histology is present in 1,978 (21.2%) patients

eTable 2: Demographic and cancer information regarding gastric cancer patients

|                                           | Gastric Cancer                 |                         |                                 |          |
|-------------------------------------------|--------------------------------|-------------------------|---------------------------------|----------|
|                                           | Morbidly Obese<br>n=224 (1.1%) | Obese<br>n = 760 (3.8%) | Non-obese<br>n = 19,271 (95.1%) | P-value* |
| <b>Age at Diagnosis,<br/>mean ± SD</b>    | 63.1 ± 11.9                    | 65.2 ± 12.4             | 68.5 ± 14.5                     | <0.01    |
| <b>Male Gender</b>                        | 109 (48.7%)                    | 401 (52.8%)             | 11,640 (60.4%)                  | <0.01    |
| <b>Race</b>                               |                                |                         |                                 |          |
| <b>White</b>                              | 131 (58.5%)                    | 383 (50.4%)             | 8,593 (44.6%)                   | <0.01    |
| <b>Black</b>                              | 28 (12.5%)                     | 82 (10.8%)              | 1,380 (7.2%)                    |          |
| <b>Others</b>                             | 65 (29.0%)                     | 295 (38.8%)             | 9,298 (48.3%)                   |          |
| <b>AJCC Stage at<br/>Diagnosis#</b>       |                                |                         |                                 |          |
| <b>0</b>                                  | 104 (1.9%)                     | 4 (2.1%)                | 104 (1.9%)                      | <0.01    |
| <b>I</b>                                  | 1,223 (21.9%)                  | 53 (28.2%)              | 1,223 (21.9%)                   |          |
| <b>II</b>                                 | 594 (10.7%)                    | 24 (12.8%)              | 594 (10.7%)                     |          |
| <b>III</b>                                | 721 (12.9%)                    | 29 (15.4%)              | 721 (12.9%)                     |          |
| <b>IV</b>                                 | 2,932 (52.6%)                  | 78 (41.5%)              | 2,932 (52.6%)                   |          |
| <b>Tumor Histology#</b>                   |                                |                         |                                 |          |
| <b>Well differentiated</b>                | 9 (4.0%)                       | 48 (6.3%)               | 772 (4.0%)                      | <0.01    |
| <b>Moderately well<br/>differentiated</b> | 52 (23.2%)                     | 170 (22.4%)             | 3,745 (19.4%)                   |          |
| <b>Poorly<br/>differentiated</b>          | 93 (41.5%)                     | 383 (50.4%)             | 10,268 (53.3%)                  |          |
| <b>Undifferentiated /<br/>anaplastic</b>  | 3 (1.3%)                       | 17 (2.2%)               | 419 (2.2%)                      |          |
| <b>Smoking</b>                            | 61 (27.2%)                     | 240 (31.6%)             | 4,236 (22.0%)                   | <0.01    |
| <b>Alcoholism</b>                         | 10 (4.5%)                      | 35 (4.6%)               | 712 (3.7%)                      | 0.37     |

\*P-value denotes comparison between obese and non-obese patients.

# Staging information is missing in 14,425 (71.2%) patients; histology information is missing in 4,183 (20.7%) patients

eTable 3: Demographic and cancer information regarding pancreatic cancer patients

|                                           | Pancreatic Cancer              |                         |                                 | P-value* |
|-------------------------------------------|--------------------------------|-------------------------|---------------------------------|----------|
|                                           | Morbidly Obese<br>n=277 (1.0%) | Obese<br>n = 940 (3.4%) | Non-obese<br>n = 26,723 (95.6%) |          |
| <b>Age at Diagnosis,<br/>mean ± SD</b>    | 62.5 ± 11.8                    | 66.3 ± 11.7             | 70.6 ± 12.8                     | <0.01    |
| <b>Early Onset (&lt;50<br/>years)</b>     | 32 (11.6%)                     | 79 (8.4%)               | 1,628 (6.1%)                    | <0.01    |
| <b>Male Gender</b>                        | 101 (32.5%)                    | 394 (41.9%)             | 13,065 (48.9%)                  | <0.01    |
| <b>Race</b>                               |                                |                         |                                 |          |
| <b>White</b>                              | 185 (66.8%)                    | 599 (63.7%)             | 17,388 (65.1%)                  | 0.05     |
| <b>Black</b>                              | 28 (10.1%)                     | 93 (9.9%)               | 2,064 (7.7%)                    |          |
| <b>Others</b>                             | 64 (23.1%)                     | 248 (26.4%)             | 7,271 (27.2%)                   |          |
| <b>AJCC Stage at<br/>Diagnosis#</b>       |                                |                         |                                 |          |
| <b>0</b>                                  | 2 (1.7%)                       | 1 (0.4%)                | 51 (0.5%)                       | 0.38     |
| <b>I</b>                                  | 14 (11.8%)                     | 41 (14.5%)              | 1,106 (10.9%)                   |          |
| <b>II</b>                                 | 24 (20.2%)                     | 42 (14.9%)              | 1,698 (16.7%)                   |          |
| <b>III</b>                                | 6 (5.0%)                       | 29 (10.3%)              | 1,144 (11.2%)                   |          |
| <b>IV</b>                                 | 73 (61.3%)                     | 169 (59.9%)             | 6,188 (60.7%)                   |          |
| <b>Tumor Histology#</b>                   |                                |                         |                                 |          |
| <b>Well differentiated</b>                | 21 (7.6%)                      | 67 (7.1%)               | 1,281 (4.8%)                    | 0.01     |
| <b>Moderately well<br/>differentiated</b> | 50 (18.1%)                     | 162 (17.2%)             | 3,507 (13.1%)                   |          |
| <b>Poorly<br/>differentiated</b>          | 42 (15.2%)                     | 142 (15.1%)             | 3,467 (13.0%)                   |          |
| <b>Undifferentiated /<br/>anaplastic</b>  | 3 (1.1%)                       | 9 (1.0%)                | 304 (1.1%)                      |          |
| <b>Smoking</b>                            | 68 (24.6%)                     | 296 (31.5%)             | 5,644 (21.1%)                   | <0.01    |
| <b>Alcoholism</b>                         | 9 (3.3%)                       | 46 (4.9%)               | 1,131 (4.2%)                    | 0.48     |
|                                           |                                |                         |                                 |          |

|  | <b>Pancreatic Cancer</b> |  |  |  |
|--|--------------------------|--|--|--|
|  |                          |  |  |  |

\*P-value denotes comparison between obese and non-obese patients.

# Missing information regarding staging is present in 17,462 (62.5%) patients; missing information regarding histology is present in 5,979 (21.4%) patients

eTable 4: Demographic and cancer information regarding colorectal cancer patients

|                                           | Colorectal Cancer                 |                          |                                 |          |
|-------------------------------------------|-----------------------------------|--------------------------|---------------------------------|----------|
|                                           | Morbidly Obese<br>n=2,109 (1.92%) | Obese<br>n=6,232 (5.66%) | Non-obese<br>n=101,718 (92.42%) | P-value* |
| <b>Age at Diagnosis,<br/>mean ± SD</b>    | 62.6 ± 11.6                       | 65.3 ± 11.9              | 69.2 ± 14.0                     | <0.01    |
| <b>Early onset (&lt;50<br/>y/o)</b>       | 262 (12.4%)                       | 576 (9.2%)               | 9,604 (9.4%)                    | <0.01    |
| <b>Male Gender</b>                        | 890 (42.2%)                       | 2,959 (47.5%)            | 51,347 (50.5%)                  | <0.01    |
| <b>Race</b>                               |                                   |                          |                                 |          |
| <b>White</b>                              | 1,428 (67.7%)                     | 4,073 (65.4%)            | 66,569 (65.4%)                  | <0.01    |
| <b>Black</b>                              | 210 (10.0%)                       | 595 (9.6%)               | 7,119 (7.0%)                    |          |
| <b>Others</b>                             | 471 (22.3%)                       | 1,564 (25.1%)            | 28,030 (27.6%)                  |          |
| <b>AJCC Stage at<br/>Diagnosis#</b>       |                                   |                          |                                 |          |
| <b>0</b>                                  | 39 (8.2%)                         | 81 (6.6%)                | 1,536 (6.3%)                    | <0.01    |
| <b>I</b>                                  | 141 (29.6%)                       | 377 (30.6%)              | 6,266 (25.9%)                   |          |
| <b>II</b>                                 | 114 (24.0%)                       | 318 (25.8%)              | 5,901 (24.4%)                   |          |
| <b>III</b>                                | 86 (18.1%)                        | 252 (20.4%)              | 4,234 (17.5%)                   |          |
| <b>IV</b>                                 | 96 (20.2%)                        | 205 (16.6%)              | 6,302 (26.0%)                   |          |
| <b>Tumor Histology#</b>                   |                                   |                          |                                 |          |
| <b>Well differentiated</b>                | 199 (9.4%)                        | 578 (9.3%)               | 8,604 (8.5%)                    | <0.01    |
| <b>Moderately well<br/>differentiated</b> | 1,283 (60.8%)                     | 3,841 (61.6%)            | 59,637 (58.6%)                  |          |
| <b>Poorly<br/>differentiated</b>          | 335 (15.9%)                       | 988 (15.9%)              | 17,260 (17.0%)                  |          |
| <b>Undifferentiated /<br/>anaplastic</b>  | 23 (1.1%)                         | 68 (1.1%)                | 1,231 (1.2%)                    |          |
| <b>Smoking</b>                            | 448 (21.2%)                       | 1,676 (26.9%)            | 18,734 (18.4%)                  | <0.01    |
| <b>Alcoholism</b>                         | 49 (2.3%)                         | 188 (3.0%)               | 2,606 (2.6%)                    | 0.12     |
| <b>Ulcerative Colitis</b>                 | 18 (0.9%)                         | 31 (0.5%)                | 548 (0.5%)                      | 0.56     |
|                                           |                                   |                          |                                 |          |

\*P-value denotes comparison between obese and non-obese patients.

# Missing information regarding staging is present in 68,786 (62.5%); patients; missing information regarding histology is present in 23,332 (21.2%) patients
